# Supplementary material
Source: HighWire-hosted journal article supplement (https://qualitysafety.bmj.com/highwire/filestream/160622/field_highwire_adjunct_files/1/bmjqs-2020-012407supp002_data_supplement.pdf)
Supplement: bmjqs-2020-012407supp002_data_supplement.pdf [file bmjqs-2020-012407supp002_data_supplement.pdf]

**Supplement A: Culture of Value and Efficiency Technical Expert Panel (TEP)**

| <b>Expert</b>                    | <b>Position and Organization</b>                                                                                                                                                                                           |
|----------------------------------|----------------------------------------------------------------------------------------------------------------------------------------------------------------------------------------------------------------------------|
| 1 Michael S. Barr, MD, MBA, FACP | Senior Vice President, Division of Medical Practice, Professionalism & Quality, American College of Physicians                                                                                                             |
| 2 Lawrence P. Casalino, MD, PhD  | Chief, Division of Outcomes and Effectiveness Research and The Livingston Farr and Associate Professor of Public Health, Department of Public Health, Weill Cornell Medical College                                        |
| 3 Michael E. Chernew, PhD        | Professor of Health Care Policy, Department of Health Care Policy, Harvard Medical School                                                                                                                                  |
| 4 Cathie Furman, RN, MHA         | Senior Vice President, Quality and Compliance, Virginia Mason Medical Center                                                                                                                                               |
| 5 Rick Gundling                  | Vice President, Healthcare Financial Practices, Healthcare Financial Management Association                                                                                                                                |
| 6 Helen Haskell                  | Member, Consumers Advancing Patient Safety                                                                                                                                                                                 |
| 7 Brent C. James, MD, MStat      | Executive Director, Institute for Health Care Delivery Research, Vice President, Medical Research and Continuing Medical Education, Intermountain Healthcare                                                               |
| 8 Tricia Johnson, PhD            | Associate Professor and Associate Chair, Graduate Program in Health Systems Management and Director, Center for the Advancement of Healthcare Value, Co-Director, Rush Center for Patient Safety Research, Rush University |
| 9 Thomas MacKenzie, MD           | Chief Quality Officer, Denver Health                                                                                                                                                                                       |
| 10 Gregory Makoul, PhD           | Chief Academic Officer and Senior Vice President for Innovation, Saint Francis Care                                                                                                                                        |
| 11 John Ovretveit, PhD           | Professor and Director of Research, The Karolinska Institute, Stockholm, Sweden                                                                                                                                            |
| 12 Jerry Penso, MD, MBA          | Chief Medical and Quality Officer, American Medical Group Association                                                                                                                                                      |
| 13 Nathan Proudlove, PhD         | Senior Lecturer (Associate Professor), Associate Head for Teaching, IMP Division, Manchester Business School, University of Manchester, UK National Health Service                                                         |
| 14 Jeff Selberg, MHA             | Executive Vice President and Chief Operating Officer, Institute for Healthcare Improvement                                                                                                                                 |
| 15 Carol J. Simon, PhD           | Senior Vice President and Director, Optum Institute for Sustainable Health                                                                                                                                                 |
| 16 Sara Singer, PhD, MBA         | Assistant Professor of Health Care Management and Policy, Department of Health Policy and Management, Harvard School of Public Health                                                                                      |
| 17 Leif Solberg, MD              | Director, Care Improvement Research, Health Partners                                                                                                                                                                       |
